# Supplementary material
Source: PubMed Central journal article supplement (PMC3383035)
Supplement: supp_112.191528_jpet_191528_suppl_table.pdf [file supp_112.191528_jpet_191528_suppl_table.pdf]

JPET #19152

The Journal of Pharmacology and Experimental Therapeutics

**Title:  $\beta_2$  Adrenoceptor Agonist Formoterol Stimulates Mitochondrial Biogenesis**

Lauren P. Wills, Richard E. Trager, Gyda C. Beeson, Christopher C. Lindsey, Yuri K. Peterson, Craig C. Beeson and Rick G. Schnellmann

Center for Cell Death, Injury, and Regeneration, Department of Pharmaceutical and Biomedical Sciences, Medical University of South Carolina, Charleston, SC 29425:  
L.P.W., R.E.T., G.C.B., C.C.L., Y.K.P., C.C.B., R.G.S.

Ralph H. Johnson VA Medical Center Charleston, SC 29401: R.G.S.

**Supplementary Table 1.** Primer sequences used for qRT-PCR experiments.

| <b>Gene</b>                     | <b>Sequence 5'-3'</b>                        |
|---------------------------------|----------------------------------------------|
| <b>APOB</b>                     | <b>FW:</b> CGT CGG CTC CAG CAT TCT           |
|                                 | <b>REV:</b> TCA CCA GTC ATT TCT GCC TTT G    |
| <b>ATP6</b>                     | <b>FW:</b> TCC TGC CTC ACT CAT TCA CAC CAA   |
|                                 | <b>REV:</b> AGT GCA GCG CCT CCA ATA AGA TGT  |
| <b>D-Loop</b>                   | <b>D1:</b> CCC AAG CAT ATA AGC TAG TAC       |
|                                 | <b>D2:</b> ATA TAA GTC ATA TTT TGG GAA CTA C |
| <b>ND1</b>                      | <b>FW:</b> TAG AAC GCA AAA TCT TAG GG        |
|                                 | <b>REV:</b> TGC TAG TGT GAG TGA TAG GG       |
| <b>ND6</b>                      | <b>FW:</b> ACT GCG ATG GCA ACT GAG GAG TAT   |
|                                 | <b>REV:</b> ACC ATA ACT ATA CAA CGC CGC CAC  |
| <b>NDUFB8</b>                   | <b>FW:</b> ACC CAA TCC AAC CGC CTT CA        |
|                                 | <b>REV:</b> CTA GGA CCC CAG AGG AAC GC       |
| <b>PGC-1<math>\alpha</math></b> | <b>FW:</b> AGG AAA TCC GAG CTG AGC TGA ACA   |
|                                 | <b>REV:</b> GCA AGA AGG CGA CAC ATC GAA CAA  |
| <b>Tubulin</b>                  | <b>FW:</b> CTC TCT GTC GAT TAC GGC AAG       |
|                                 | <b>REV:</b> TGG TGA GGA TGG AGT TGT AGG      |
